# Supplementary material
Source: publisher figshare collection journal article supplement (https://tandf.figshare.com/ndownloader/files/12551987)
Supplement: Supplementary file 1 [file 12551987]

**Appendix:**

**Figure A1.** Sensitivity of accuracy to the feature threshold values (linear feature ranged from 0.5 to 1 and angular feature ranged from 0 to 10 degrees) in the three experiment datasets. (a), (b) and (c) are the precision rate, recall rate and quality rate distribution of different linear and angular feature for UHM Dataset, respectively; (d), (e) and (f) are the precision rate, recall rate and quality rate distribution of different linear and angular feature for HNL Dataset, respectively; (g), (h) and (i) are the precision rate, recall rate and quality rate distribution of different linear and angular feature for MNST Dataset, respectively.

| 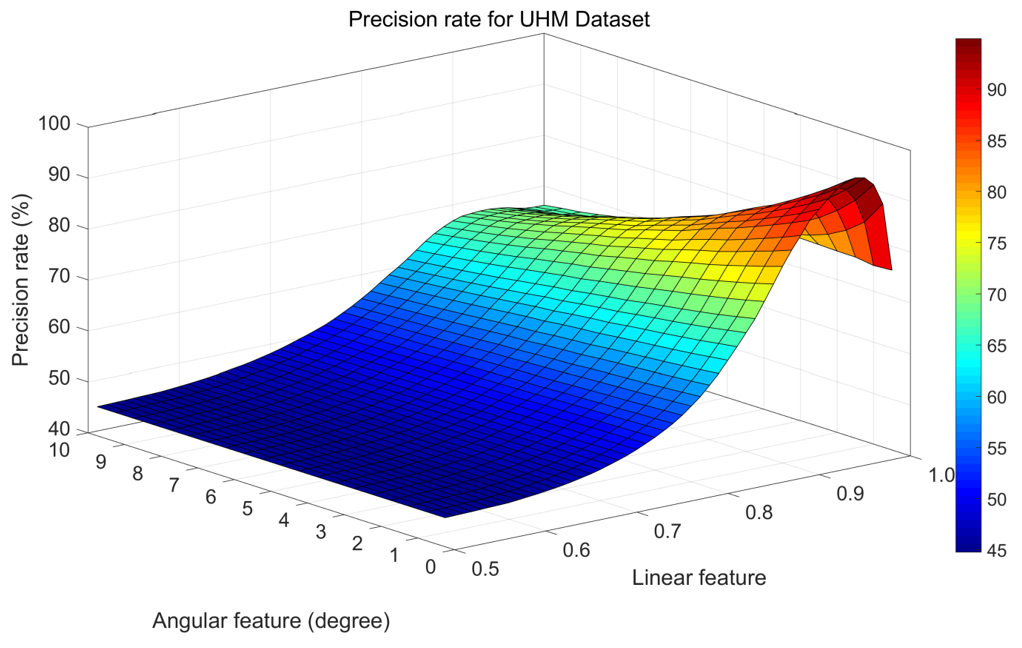  (**a**) |
| --- |
| 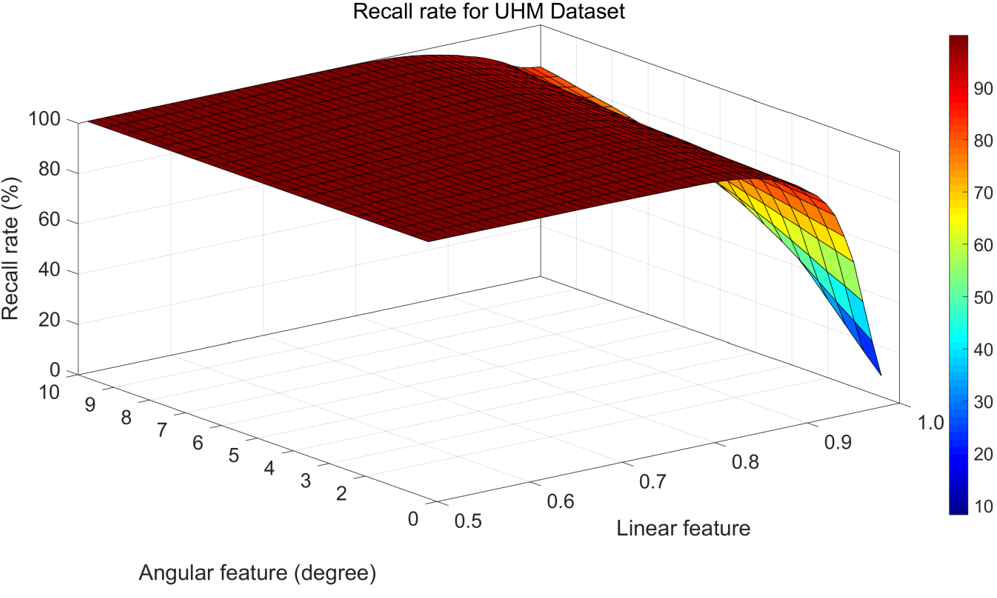  (**b**) |
| 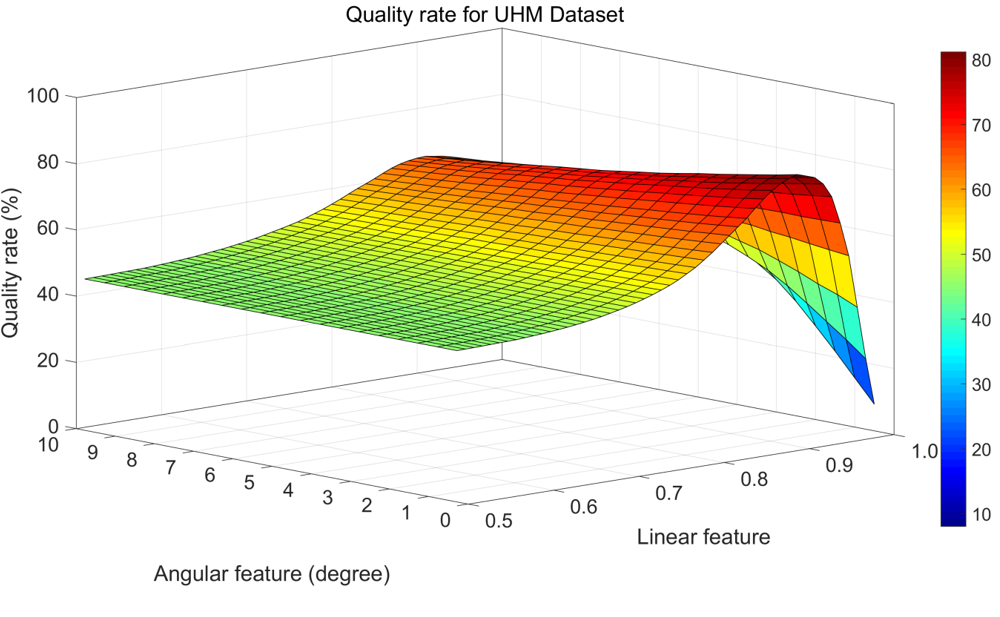  (**c**) |
| 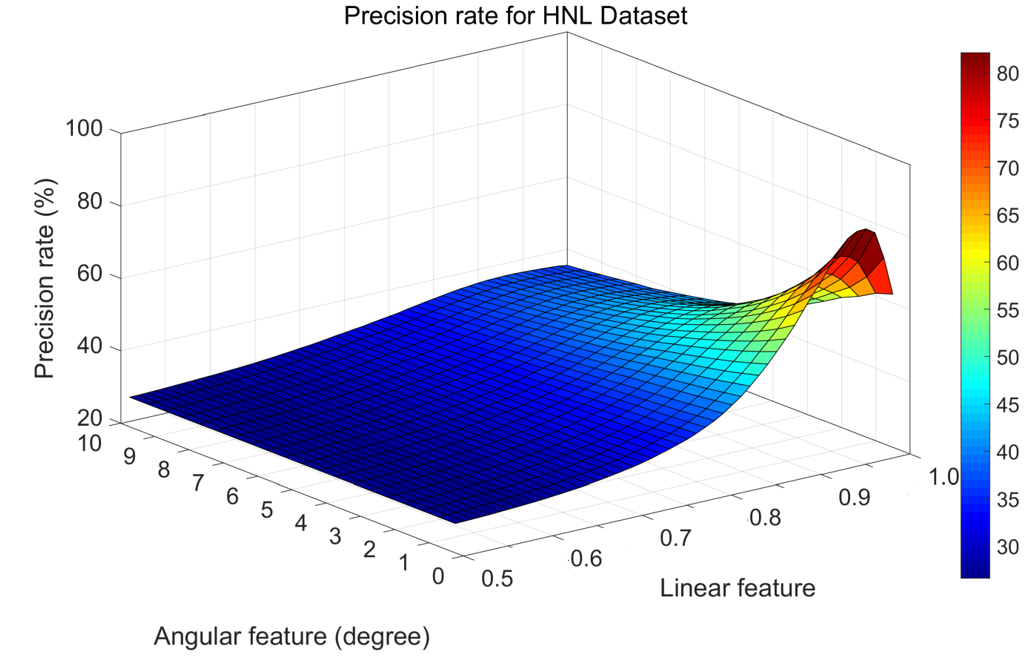  (**d**) |
| 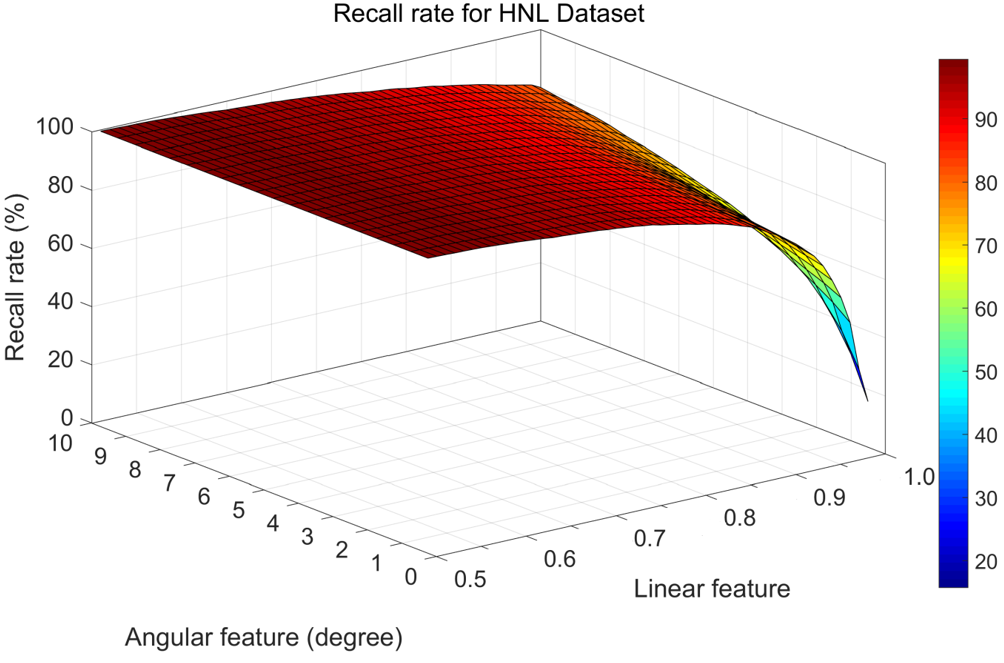  (**e**) |
| 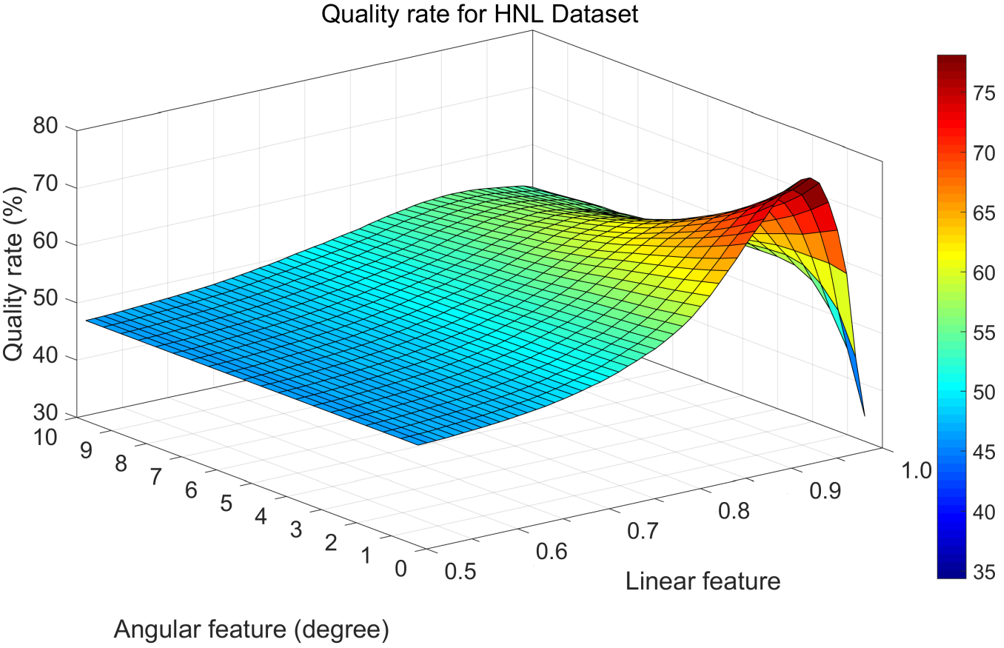  (**f**) |
| 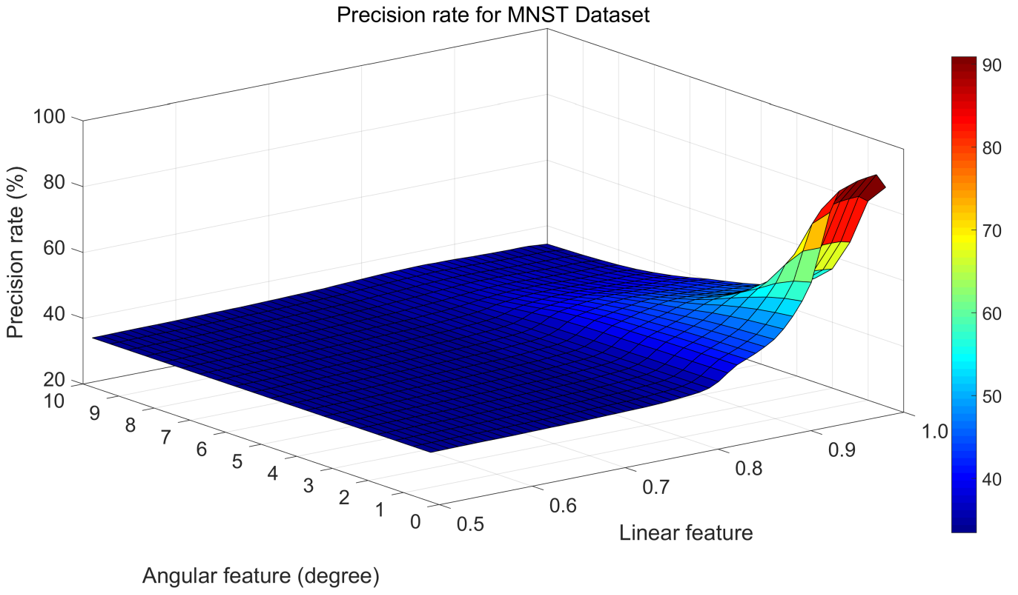  (**g**) |
| 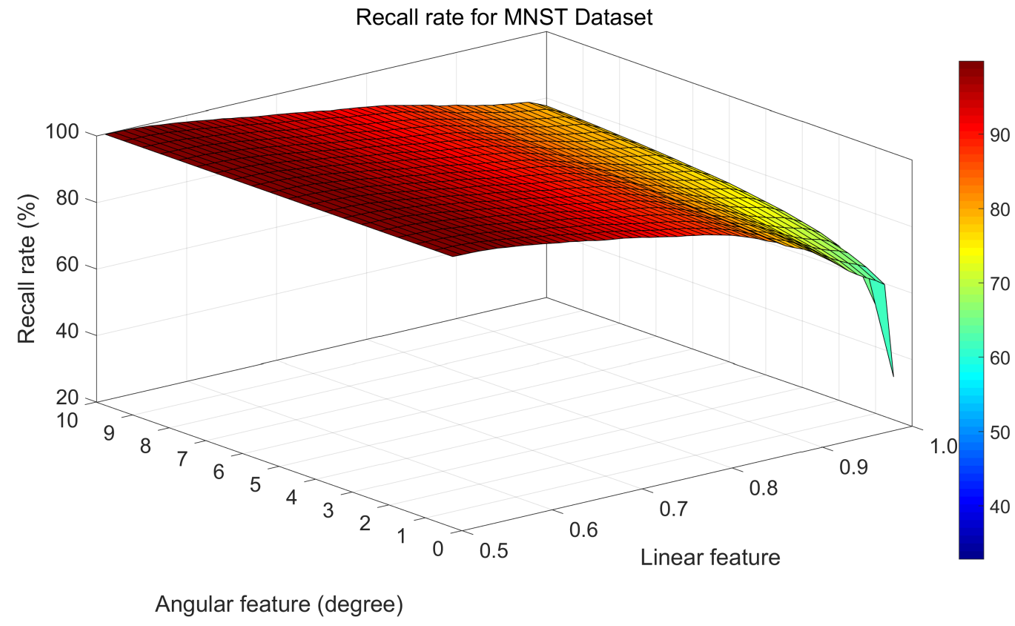  (**h**) |
| 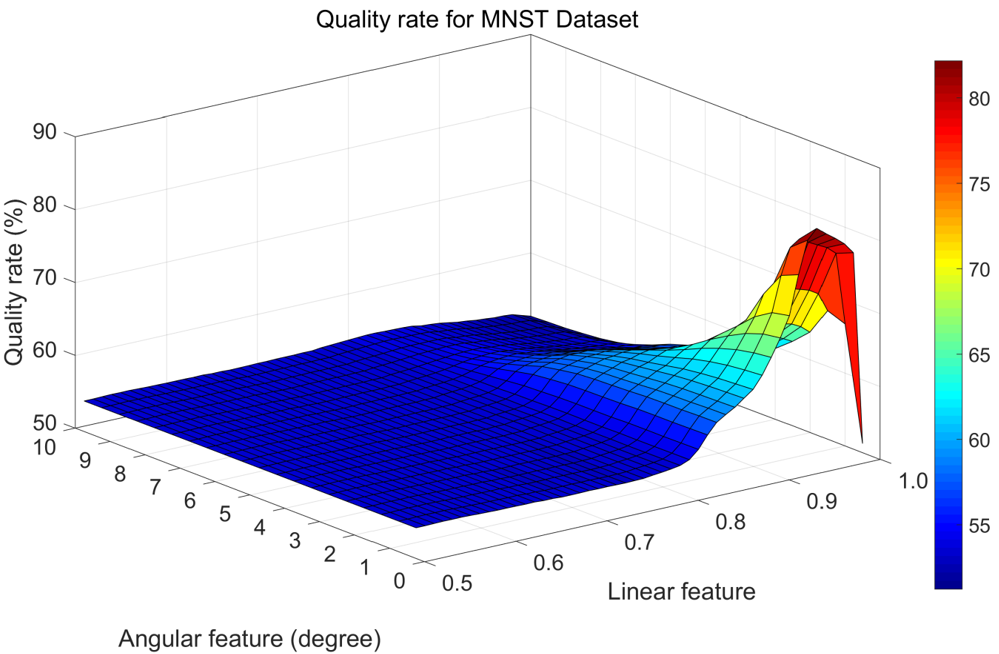  (**i**) |
